# Supplementary material for: Human papillomavirus-16 E6 activates the pentose phosphate pathway to promote cervical cancer cell proliferation by inhibiting G6PD lactylation
Source: PubMed Central journal article supplement — Redox Biol. 2024 Mar 1;71:103108. doi: 10.1016/j.redox.2024.103108 (PMC10937312; doi:10.1016/j.redox.2024.103108), 2024-03-01
Supplement: mmc1.pdf [file mmc1.pdf]

# Supplementary Figure 1

S1A

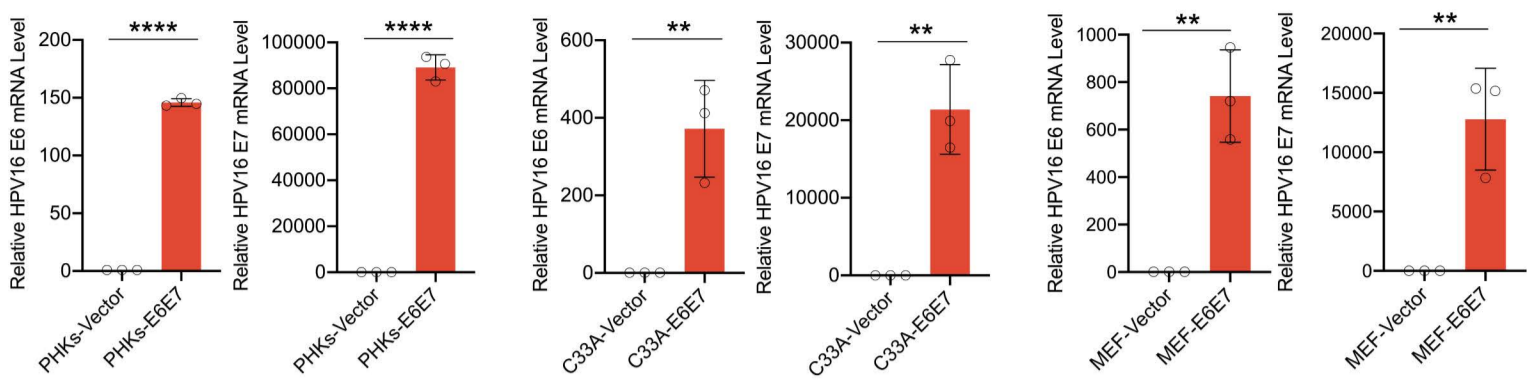

S1B

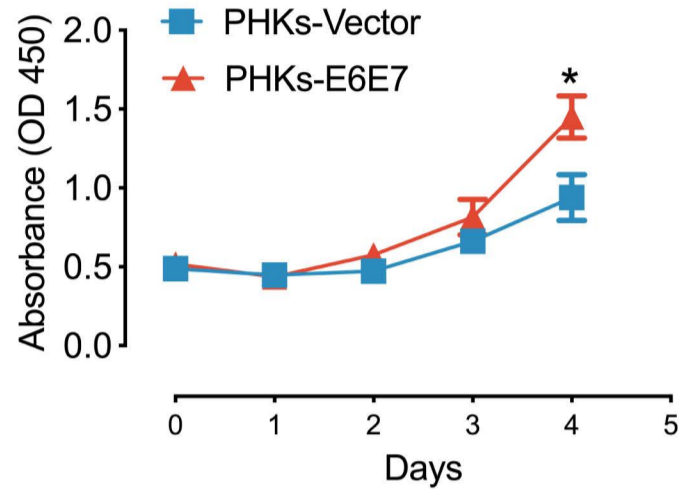

S1C

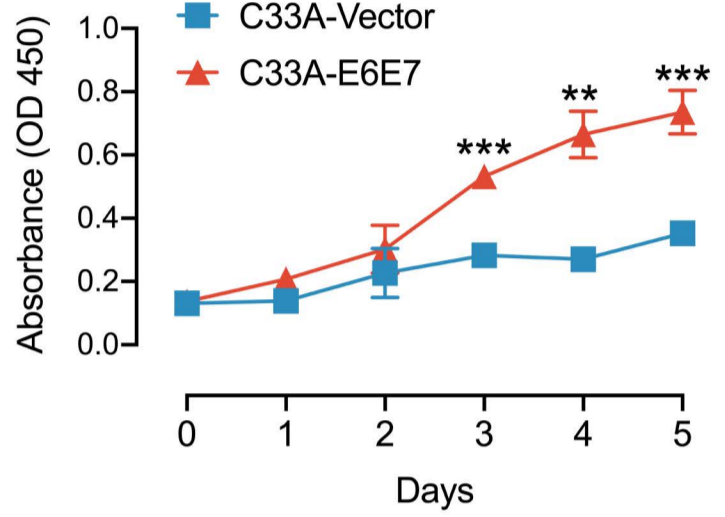

S1D

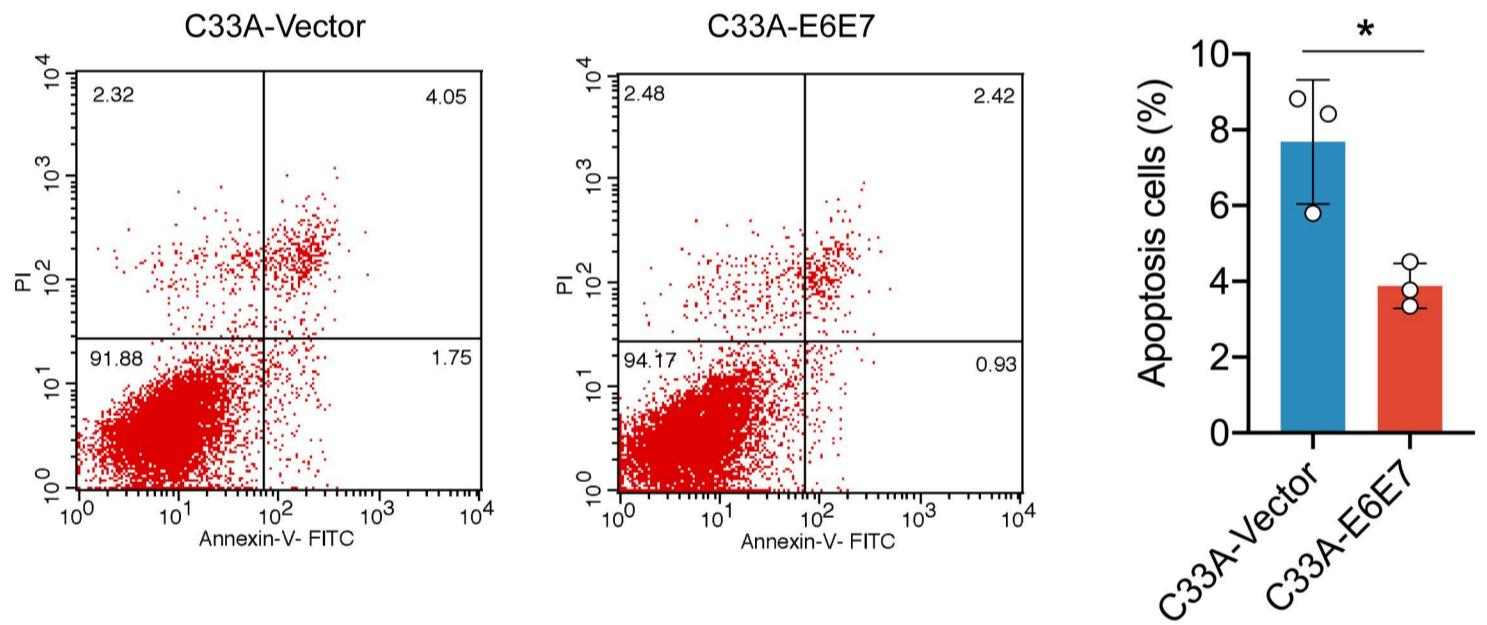

S1E

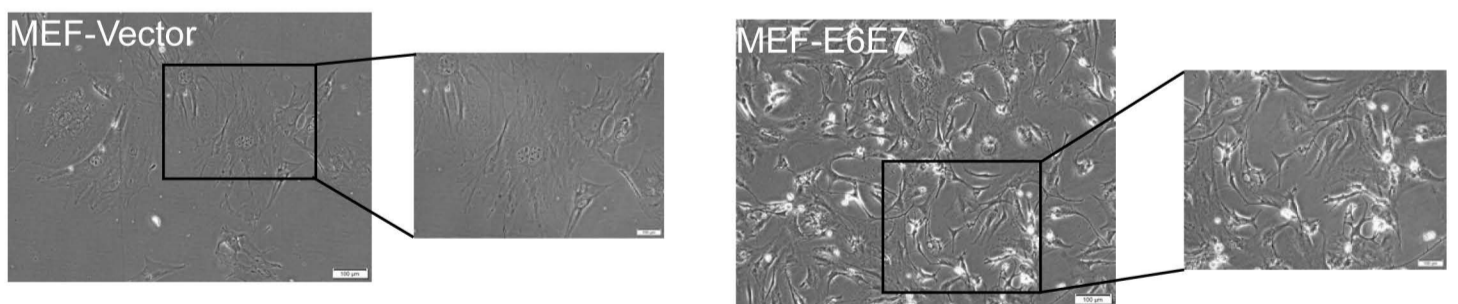

S1F

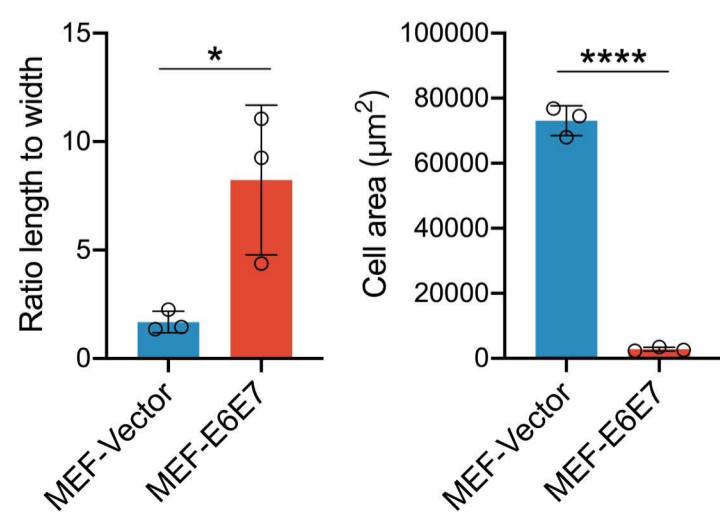

S1G

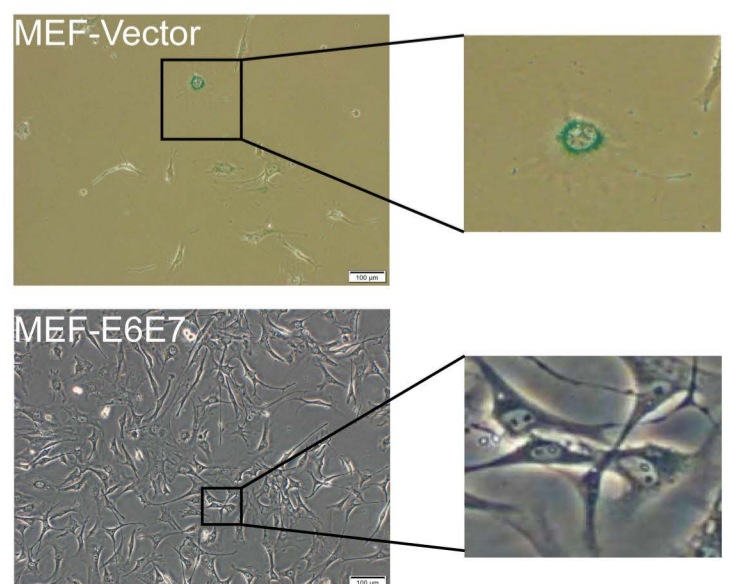

# Supplementary Figure 2

S2A

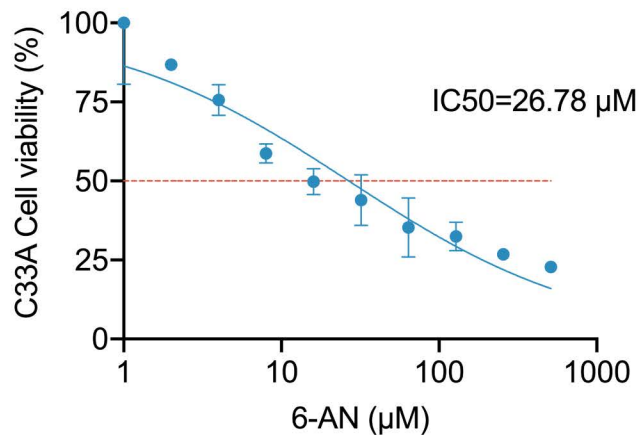

S2B

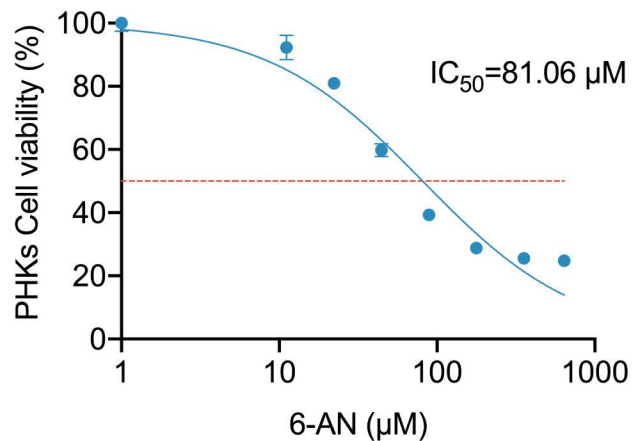

S2C

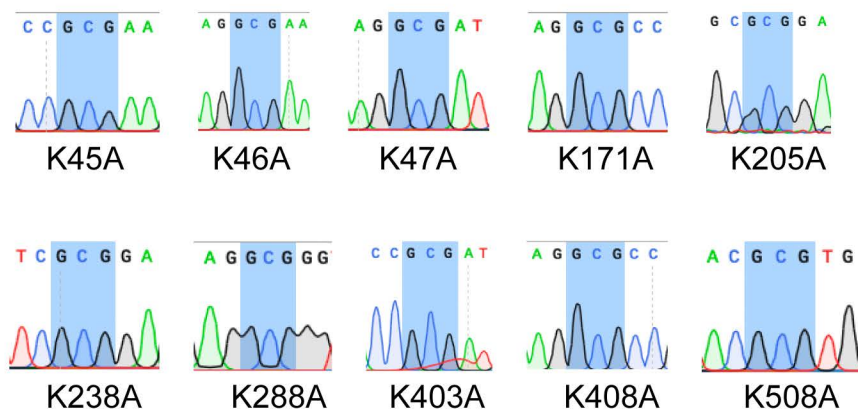

S2D

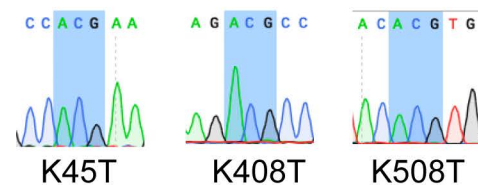

# Supplementary Figure 3

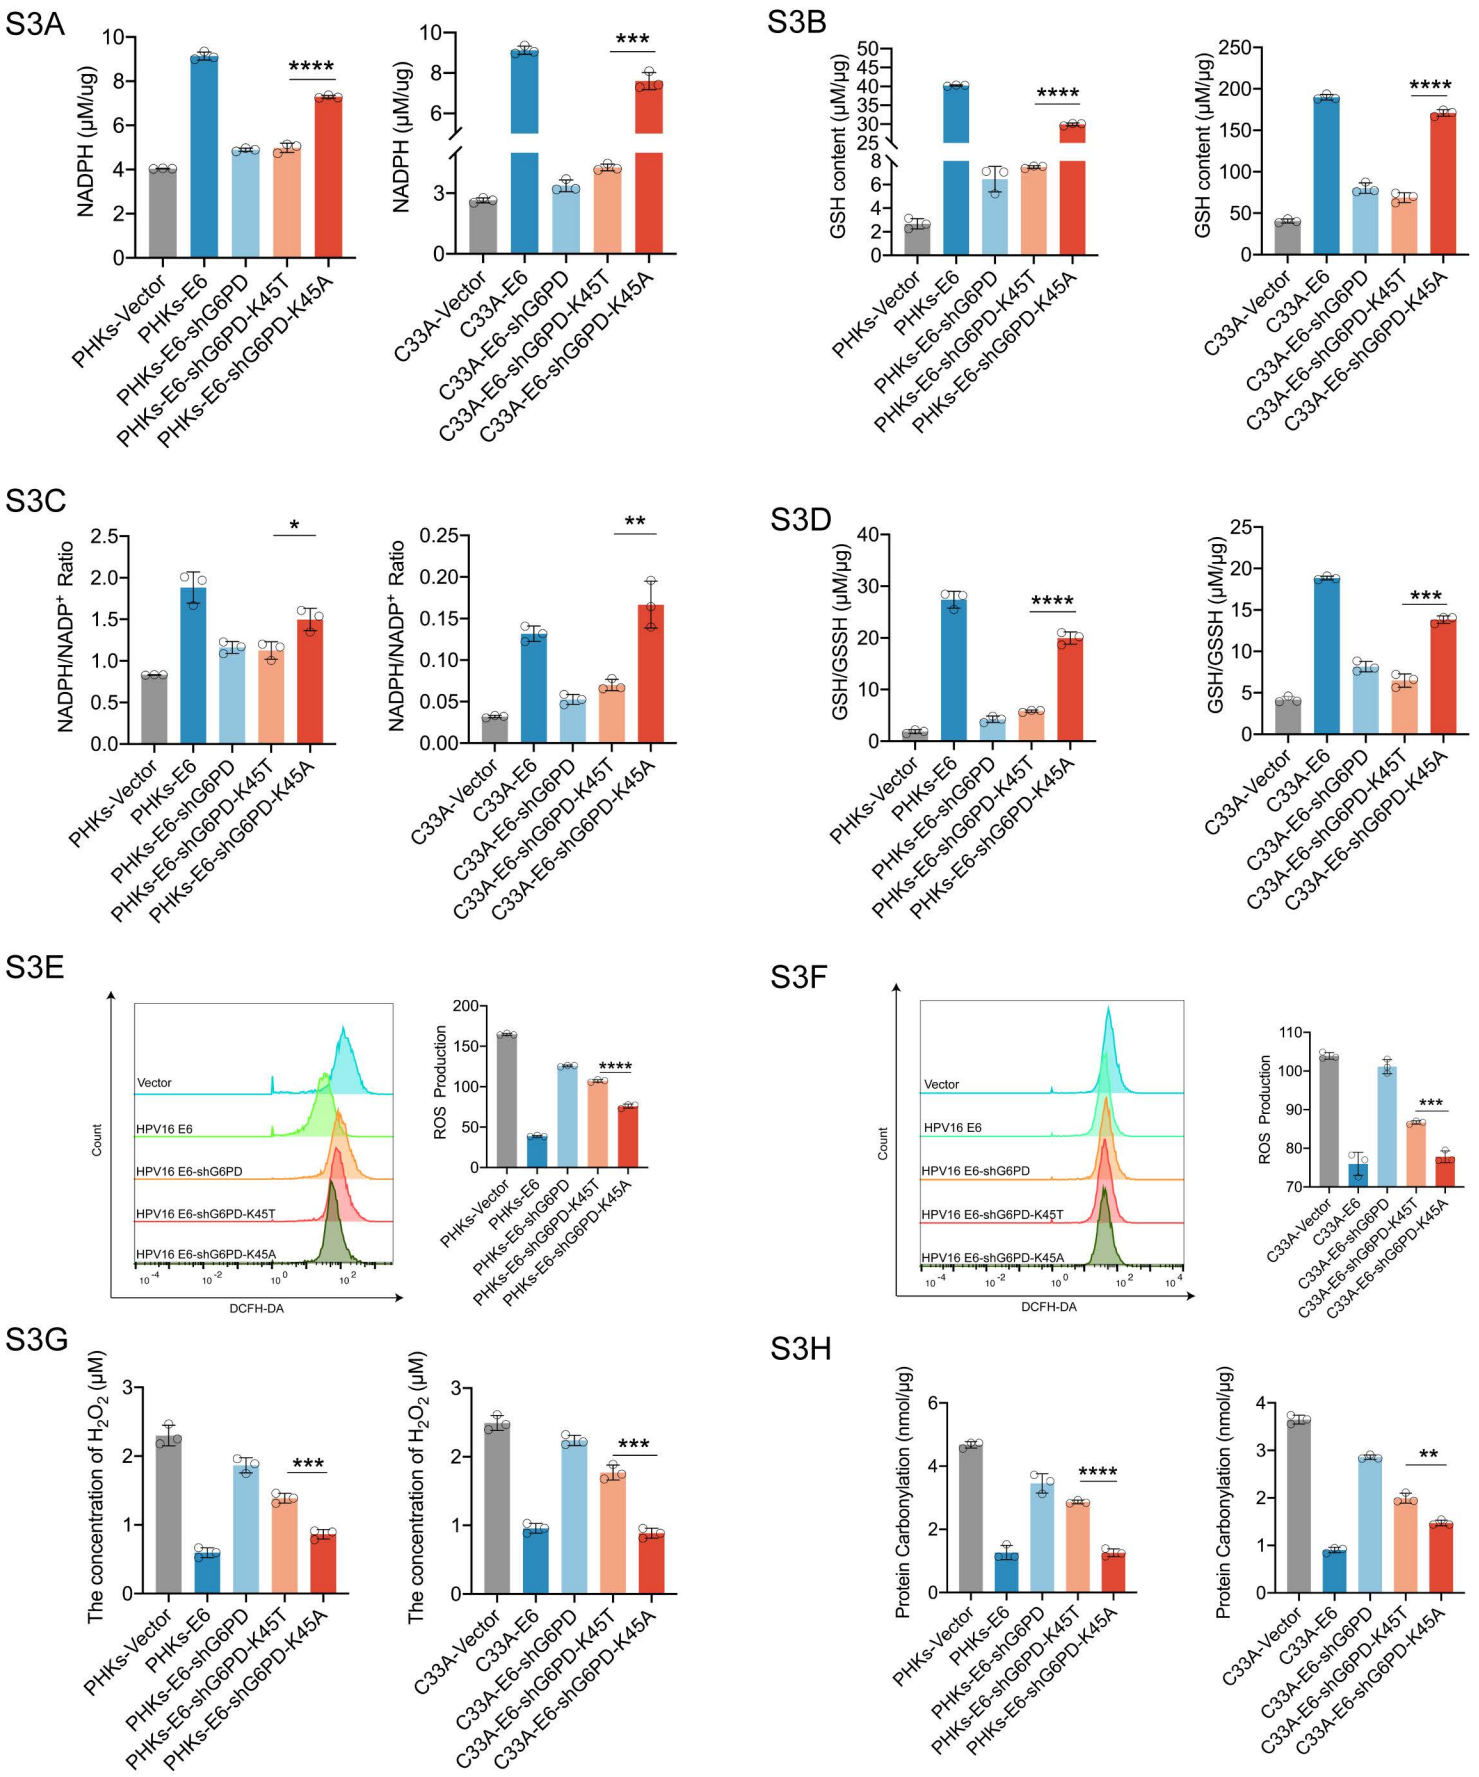



S4A

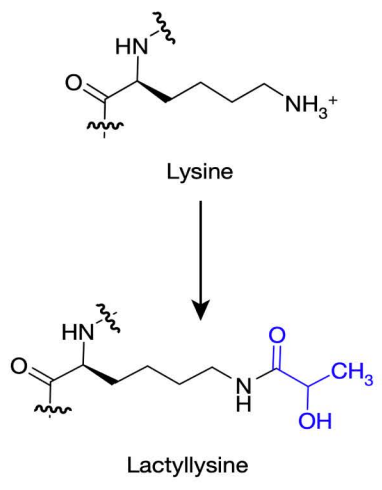

Lysine lactylation

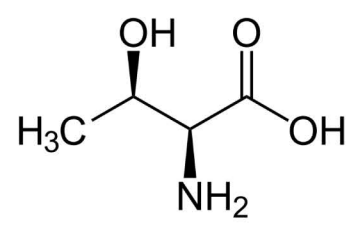

L-Threonine

S4B

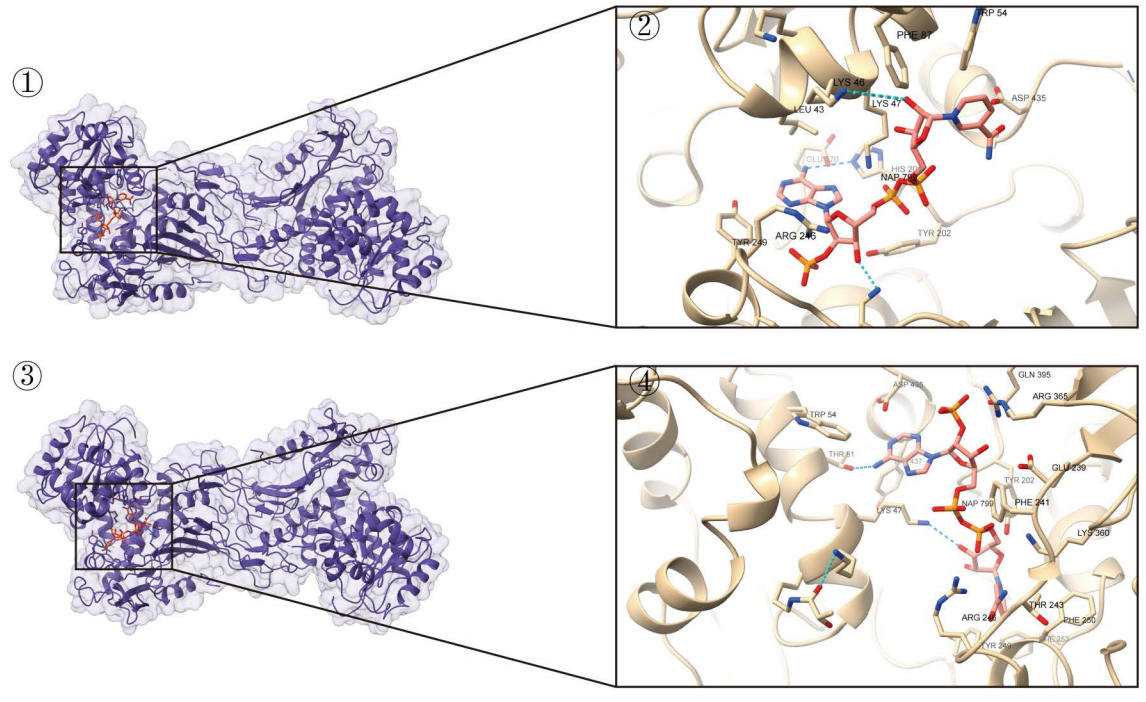

S4C

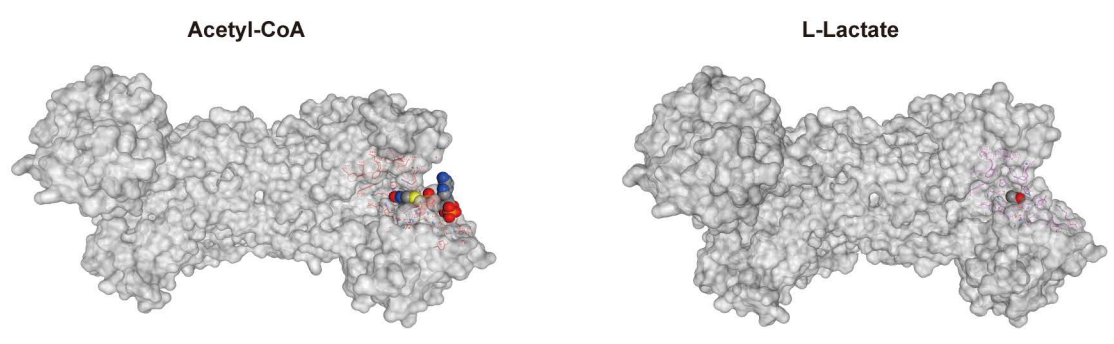

| Ligand     | Receptor | Docking Score |
|------------|----------|---------------|
| Acetyl-CoA | G6PD     | 175.97        |
| L-Lactate  | G6PD     | 208.85        |

Table represents the L-Lactate/L-Lactate—DCBLD1 interacting atoms and dock score analyzed by online tool CB-Dock2 (<https://cadd.labshare.cn/cb-dock2/index.php>).
